# Supplementary material for: Economical and rapid manufacturing of lateral flow immunosensor using fountain pens and gold colloidal solution
Source: Royal Society of Chemistry journal article supplement (doi:10.1039/c4ay02940b), 2015-01-01
Supplement: c4ay02940b1.pdf [file c4ay02940b1.pdf]

**Supplementary information**

**Economical and rapid manufacturing of lateral flow immunosensor using fountain pens  
and gold colloidal solution**

*Seoyeon Choi<sup>a</sup>, Jung-Hyun Lee<sup>b</sup>, Jong-Soon Choi<sup>c,d</sup> and Hyo-Il Jung<sup>a,b\*</sup>*

*<sup>a</sup> National Core Research Center for Nanomedical Technology, Yonsei University, Seoul,  
Korea*

*<sup>b</sup> School of Mechanical Engineering, Yonsei University, Seoul, Korea*

*<sup>c</sup> Division of Life Science, Korea Basic Science Institute, Daejeon, Korea*

*<sup>d</sup> Graduate School of Analytical Science and Technology, Chungnam National University,  
Daejeon, Korea*

\* Address correspondence to:

E-mail address: [uridle7@yonsei.ac.kr](mailto:uridle7@yonsei.ac.kr)

Telephone number: +82-(0)2-2123-5814

Fax number: +82-(0)2-312-2159

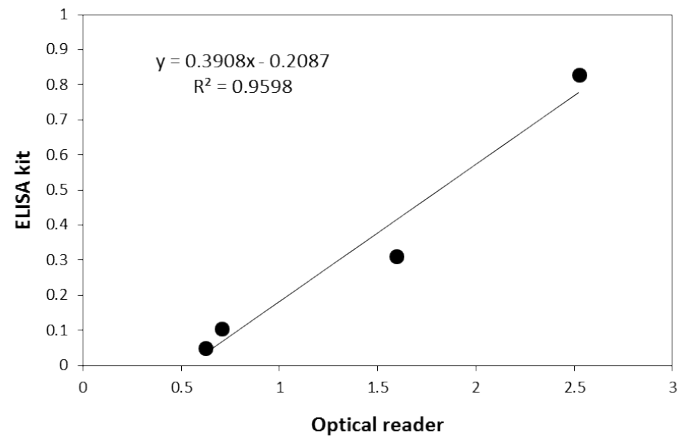

Fig. S1 Correlation between optical reader and commercial ELISA kit at various concentrations of salivary cortisol (1, 5, 10, 100 ng/ml) to evaluate the accuracy of the assay. The cortisol analysis of optical reader was performed using the lateral flow immunosensor, and the signal intensities were measured.
